# Supplementary material
Source: PubMed Central journal article supplement (PMC8013068)
Supplement: 14-00568.pdf [file 14-00568.pdf]

**On-line Table 1: Leptomeningeal collateral grading scores**

| Type              | Author                    | Description                                                                                  | Grading System                                                                                                              |
|-------------------|---------------------------|----------------------------------------------------------------------------------------------|-----------------------------------------------------------------------------------------------------------------------------|
| 4-Point absolute  | Tan et al <sup>3</sup>    | Extent of filling in territory of occluded vessel                                            | 0 = No collateral filling<br>1 = Filling in <50%<br>2 = Filling in 50%–99%<br>3 = Filling in 100% of the ischemic territory |
| 5-Point relative  | Maas et al <sup>8</sup>   | Comparison of symptomatic hemisphere with contralateral hemisphere                           | 1 = Absent<br>2 = Less than<br>3 = Equal to<br>4 = Greater than<br>5 = Exuberant                                            |
| 20-Point relative | Menon et al <sup>11</sup> | Regional comparison of symptomatic hemisphere with contralateral hemisphere based on ASPECTS | 0 = No collateral filling<br>1 = Less than<br>2 = Equal to or greater than                                                  |

**On-line Table 2: Patient characteristics (collateral grading)<sup>a</sup>**

|                                        | Conventional CTA | Dynamic CTA    |                     |              |
|----------------------------------------|------------------|----------------|---------------------|--------------|
|                                        |                  | Arterial Phase | Arteriovenous Phase | Venous Phase |
| 4-Point absolute <sup>b</sup>          | 1.45 ± 0.88      | 1.65 ± 0.89    | 2.08 ± 0.90         | 2.12 ± 0.85  |
| 5-Point relative <sup>b</sup>          | 2.00 ± 0.60      | 2.04 ± 0.56    | 2.45 ± 0.85         | 2.33 ± 0.73  |
| 20-Point relative <sup>b</sup>         | 7.13 ± 4.66      | 8.50 ± 4.71    | 11.79 ± 5.03        | 10.42 ± 4.45 |
| Volume of hypoattenuation <sup>c</sup> | 106 (79–133)     | 94 (60–132)    | 68 (25–108)         | 35 (11–88)   |

<sup>a</sup> Collateral vessel grading scores yielded higher results in dynamic CTA than in conventional CTA. The volume of hypoattenuation was highest in conventional CTA. Among different time-phases of dynamic CTA, the volume of hypoattenuation decreased continuously from the arterial to venous phase.

<sup>b</sup> Mean.

<sup>c</sup> Median (first-third quartiles).

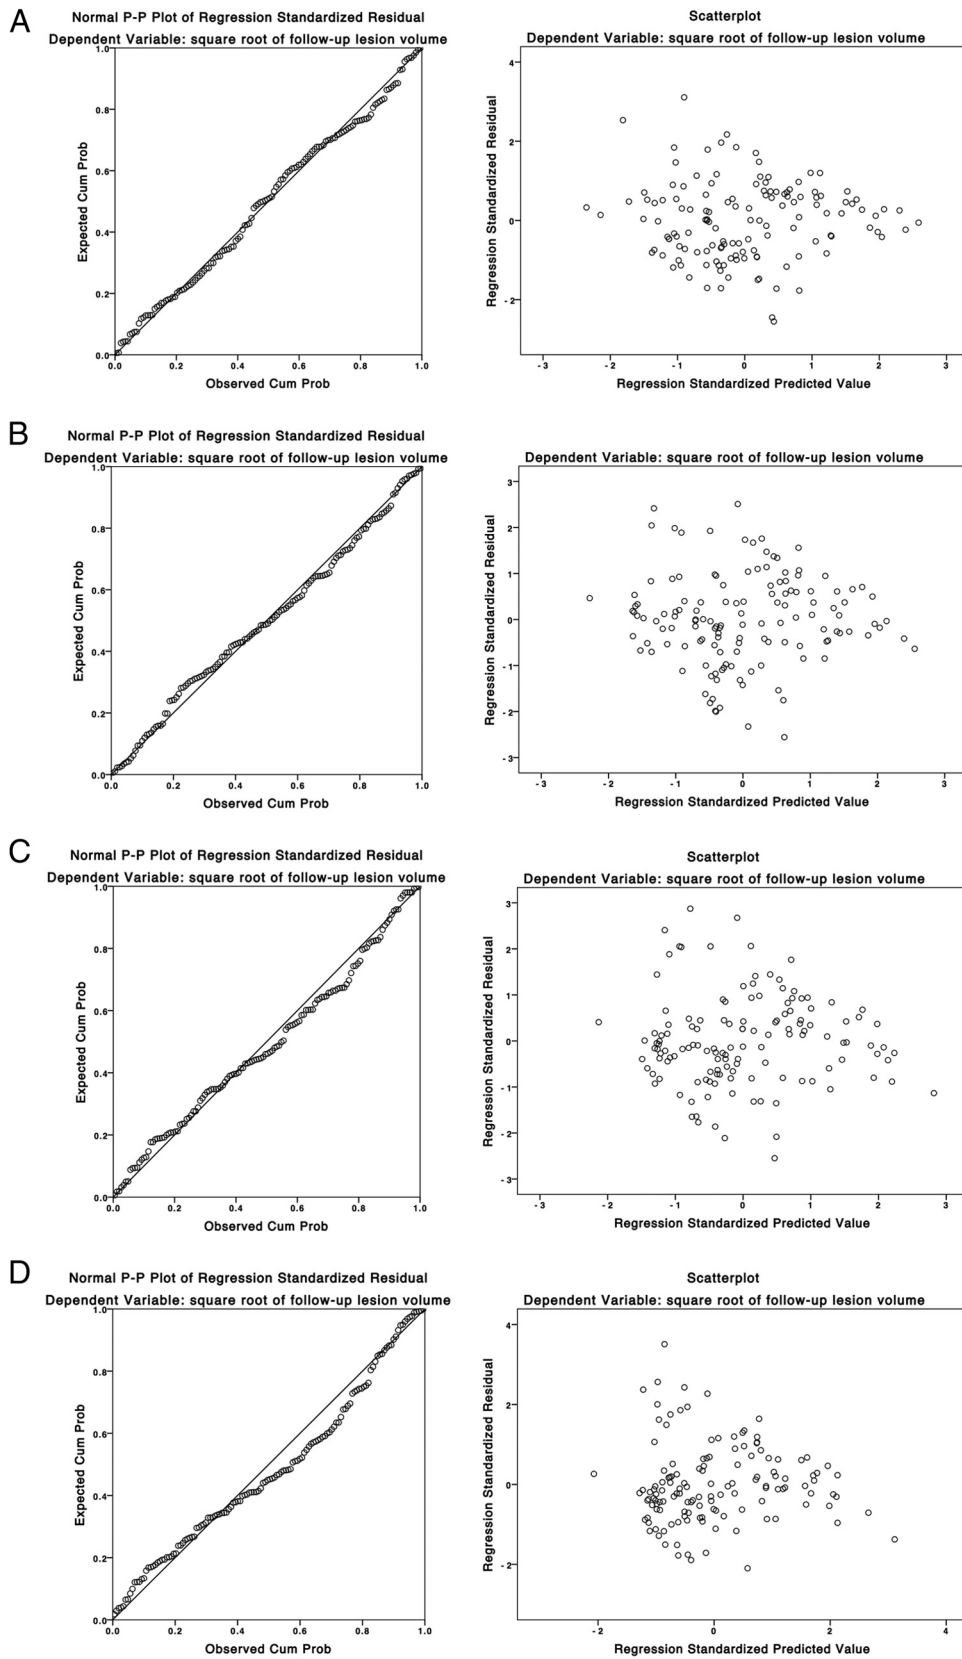

**ON-LINE FIG.** Residual normal probability-probability and scatterplots of multivariate linear regression models containing the volume of hypoattenuation in conventional CTA (A), volume of hypoattenuation in the arterial phase (B), volume of hypoattenuation in the arteriovenous phase (C), and volume of hypoattenuation in the venous phase (D). P-P indicates probability-probability; Cum, cumulative; Prob, probability.
